# Supplementary material for: Size-Resolved Dust Direct Radiative Effect Efficiency Derived from Satellite Observations
Source: Copernicus journal article supplement (doi:10.5194/acp-2022-350), 2022-06-08
Supplement: Supplementary file 1 [file acp-2022-350-supplement.pdf]

*Supplement of*

**Size-Resolved Dust Direct Radiative Effect Efficiency Derived from  
Satellite Observations**

**Qianqian Song et al.**

*Correspondence to:* Qianqian Song (cd11735@umbc.edu)

# 1. Demonstration of monthly-mean *size-resolved* DREE dataset

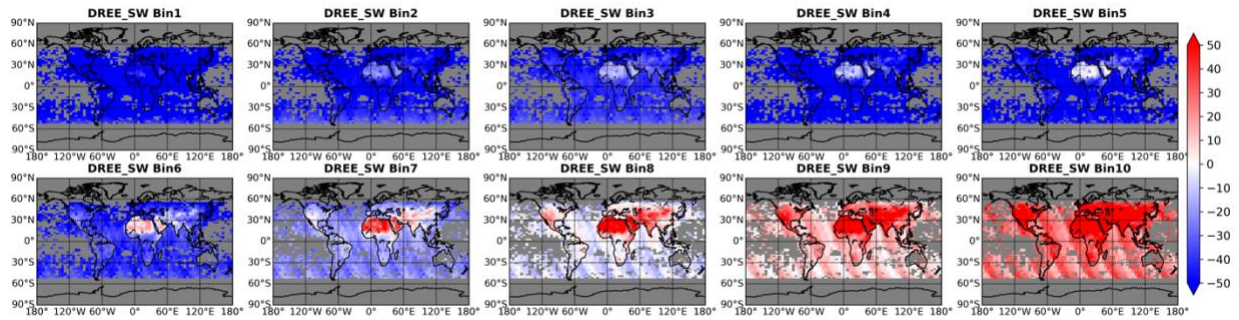

Figure S1. Global distribution of monthly-mean  $DREE^{SW}$  of MeanSWRI-Spheroid dust model at TOA for June obtained from the *size-resolved* DREE dataset. Grey area indicates area without DREE derivations (e.g., DAOD retrieval is not available or  $DAOD^{532nm} \leq 0.01$  over the area). The strip pattern seen in large size bins (e.g., Bin7~Bin10) is due to the variation of surface albedo with SZA.

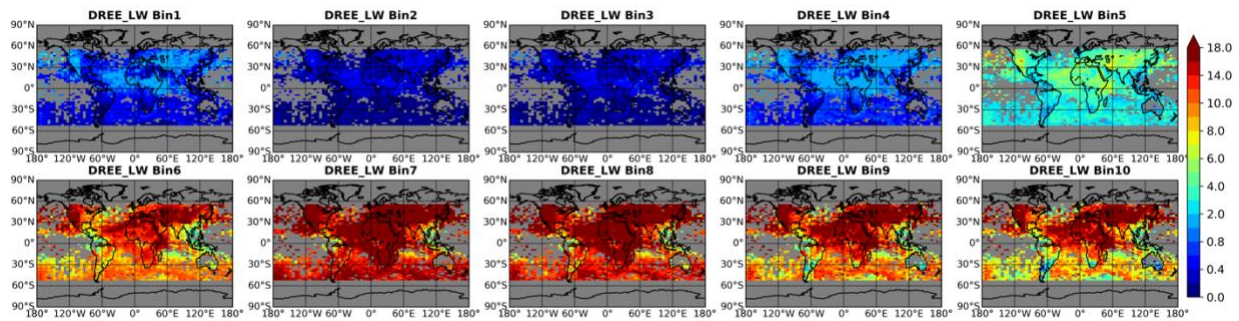

Figure S2. Global distribution of monthly-mean  $DREE^{LW}$  of MeanLWRI-Spheroid dust model at TOA for June obtained from the *size-resolved* DREE dataset. Grey area indicates area without DREE derivations (e.g., DAOD retrieval is not available or  $DAOD^{532nm} \leq 0.01$  over the area).
